# Supplementary material for: Statin use and non-melanoma skin cancer risk: a meta-analysis of randomized controlled trials and observational studies
Source: PubMed Central journal article supplement (PMC5650431; doi:10.18632/oncotarget.20034), 2017-08-08
Supplement: oncotarget-08-75411-s001.pdf [file oncotarget-08-75411-s001.pdf]

## **Statin use and non-melanoma skin cancer risk: a meta-analysis of randomized controlled trials and observational studies**

### **SUPPLEMENTARY MATERIALS**

**Supplementary Table 1: Risk of bias and quality assessment of included randomized trials and observational studies. See Supplementary\_Table\_1**
